# Supplementary material for: Porosity and Permeability Prediction through Forward StratigraphicSimulations Using GPM TM and Petrel TM : Application in ShallowMarine Depositional Settings
Source: Copernicus journal article supplement (doi:10.5194/gmd-2020-37), 2020-06-24
Supplement: Supplementary file [file gmd-2020-37-AC1-supplement.pdf]

**Table 3** Lithofacies classification in the forward stratigraphic model; showing the command used in the property calculator tool in Petrel™.

| Lithofacies Classification |                            |                                                                                                                                                                                                        |
|----------------------------|----------------------------|--------------------------------------------------------------------------------------------------------------------------------------------------------------------------------------------------------|
| Facies Code                | Lithofacies                | Command Used in Petrel's Property Calculator                                                                                                                                                           |
| 0                          | Marine Shale               | If(Sand_fine>=0.19 And Sand_fine<=0.21 Or Silt>=0.19 And Silt<=0.2 Or Clay>=0.2 And Clay<=0.21 Or Depth_of_deposition>=-82 And Depth_of_deposition<=-78)                                               |
| 1                          | Muddy Shallow Bay Fill     | If( Sand_fine>=0.36 And Sand_fine<=0.38 Or Silt>=0.18 And Silt<=0.2 Or Clay>0.18 And Clay<=0.19 Or Depth_of_deposition>=-30 And Depth_of_deposition<=-20)                                              |
| 2                          | Sandy Shallow Bay Fill     | If(Sand_coarse>=0.65 And Sand_coarse<=0.73 Or Sand_fine>=0.18 And Sand_fine<=0.22 Or Silt>=0.18 And Silt<=0.2 Or Clay>=0.17 And Clay<=0.18 Or Depth_of_deposition>=-3 And Depth_of_deposition<=0)      |
| 3                          | Channel Fill Sandstone     | If( Sand_coarse>=0.5 And Sand_coarse<=0.68 Or Sand_fine>=0.23 And Sand_fine<=0.25 Or Silt>=0.17 And Silt<=0.18 Or Depth_of_deposition>=0 And Depth_of_deposition<=2)                                   |
| 4                          | Lower Shoreface Units      | If( Sand_coarse>=0.19 And Sand_coarse<=0.31 Or Sand_fine>=0.19 And Sand_fine<=0.24 Or Silt>=0.4 And Silt<=0.48 Or Clay>=0.19 And Clay<=0.31 Or Depth_of_deposition>=-83 And Depth_of_deposition<=50)   |
| 5                          | Middle Shoreface Units     | If( Sand_coarse>=0.32 And Sand_coarse<=0.53 Or Sand_fine>=0.25 And Sand_fine<=0.32 Or Silt>=0.26 And Silt<=0.32 Or Clay>=0.19 And Clay<=0.21 Or Depth_of_deposition>=-38 And Depth_of_deposition<=-12) |
| 6                          | Upper Shoreface Units      | If(Sand_coarse>=0.53 And Sand_coarse<=0.72 Or Sand_fine>=0.28 And Sand_fine<=0.33 Or Silt>=0.16 And Silt<=0.21 Or Depth_of_deposition>=-10 And Depth_of_deposition<=6)                                 |
| 7                          | Distal Mouth Bar Units     | If( Sand_fine>=0.23 And Sand_fine<=0.27 Or Silt>=0.38 And Silt<=0.43 Or Clay>=0.19 And Clay<=0.21 Or Depth_of_deposition>=-95 And Depth_of_deposition<=-80)                                            |
| 8                          | Proximal Mouth Bar Units   | If( Sand_coarse>=0.53 And Sand_coarse<=0.71 Or Sand_fine>=0.27 And Sand_fine<=0.32 Or Silt>=0.16 And Silt<=0.21 Or Clay>=0.06 And Clay<=0.07 Or Depth_of_deposition>=-30 And Depth_of_deposition<=-27) |
| 9                          | Tide Influenced Sandstones | If( Sand_coarse>=0.53 And Sand_coarse<=0.71 Or Sand_fine>=0.26 And Sand_fine<=0.31 Or Silt>=0.35 And Silt<=0.41 Or Depth_of_deposition>=-5 And Depth_of_deposition<=1)                                 |
| 10                         | Fluvial Channel Sandstones | If(Sand_coarse>=0.54 And Sand_coarse<=0.56 Or Sand_fine>=0.27 And Sand_fine<=0.29 Or Silt>=0.19 And Silt<=0.21 Or Depth_of_deposition>=-2 And Depth_of_deposition<=2)                                  |
| 11                         | Coal                       | Estimated as background attribute                                                                                                                                                                      |
| 12                         | Coastal plain fines        | If( Silt>=0.31 And Silt<=0.43 Or Clay>=0.31 And Clay<=0.35 Or Depositional_depth>=-100 And Depositional_depth<=-40)                                                                                    |
| 13                         | Marine Mudstone            | If( Sand_fine>=0.36 And Sand_fine<=0.38 Or Silt>=0.4 And Silt<=0.52 Or Clay>=0.45 And Clay<=0.78 Or Depth_of_deposition>=-105 And Depth_of_deposition<=-90)                                            |

**Table i.** Porosity estimates for additional realizations in validation well 1 (VP1)

| <b>Model Realization</b> | <b>5 m</b> | <b>10 m</b> | <b>15 m</b> | <b>20 m</b> | <b>25 m</b> | <b>30 m</b> |
|--------------------------|------------|-------------|-------------|-------------|-------------|-------------|
| R1                       | 0.22       | 0.19        | 0.22        | 0.22        | 0.22        | 0.22        |
| R2                       | 0.23       | 0.17        | 0.26        | 0.21        | 0.24        | 0.18        |
| R3                       | 0.17       | 0.16        | 0.22        | 0.27        | 0.21        | 0.24        |
| R4                       | 0.24       | 0.21        | 0.23        | 0.25        | 0.22        | 0.17        |
| R5                       | 0.18       | 0.21        | 0.2         | 0.27        | 0.21        | 0.24        |
| R6                       | 0.23       | 0.22        | 0.27        | 0.22        | 0.22        | 0.23        |
| R7                       | 0.23       | 0.25        | 0.22        | 0.21        | 0.22        | 0.25        |
| R8                       | 0.23       | 0.21        | 0.22        | 0.19        | 0.17        | 0.25        |
| R9                       | 0.18       | 0.24        | 0.25        | 0.25        | 0.25        | 0.27        |
| R10                      | 0.23       | 0.22        | 0.20        | 0.18        | 0.27        | 0.25        |
| R11                      | 0.21       | 0.19        | 0.21        | 0.25        | 0.21        | 0.20        |
| R12                      | 0.20       | 0.20        | 0.23        | 0.26        | 0.22        | 0.22        |
| R13                      | 0.27       | 0.20        | 0.26        | 0.20        | 0.23        | 0.18        |
| R15                      | 0.17       | 0.18        | 0.18        | 0.19        | 0.21        | 0.21        |
| R16                      | 0.17       | 0.18        | 0.22        | 0.15        | 0.17        | 0.19        |
| R17                      | 0.24       | 0.21        | 0.26        | 0.16        | 0.20        | 0.22        |
| R18                      | 0.20       | 0.23        | 0.15        | 0.25        | 0.27        | 0.24        |
| R19                      | 0.20       | 0.19        | 0.19        | 0.27        | 0.23        | 0.24        |
| R21                      | 0.25       | 0.21        | 0.26        | 0.23        | 0.26        | 0.18        |
| R22                      | 0.21       | 0.13        | 0.20        | 0.25        | 0.15        | 0.22        |
| R23                      | 0.19       | 0.14        | 0.26        | 0.21        | 0.21        | 0.25        |
| R24                      | 0.19       | 0.19        | 0.22        | 0.24        | 0.26        | 0.14        |
| R25                      | 0.25       | 0.22        | 0.20        | 0.26        | 0.22        | 0.27        |
| R27                      | 0.21       | 0.21        | 0.24        | 0.23        | 0.18        | 0.24        |
| R28                      | 0.18       | 0.18        | 0.23        | 0.25        | 0.21        | 0.19        |
| R29                      | 0.19       | 0.18        | 0.20        | 0.19        | 0.26        | 0.24        |
| R30                      | 0.26       | 0.20        | 0.21        | 0.19        | 0.23        | 0.21        |
| R31                      | 0.21       | 0.20        | 0.24        | 0.19        | 0.27        | 0.26        |
| R32                      | 0.25       | 0.25        | 0.26        | 0.23        | 0.23        | 0.26        |
| R33                      | 0.23       | 0.22        | 0.23        | 0.21        | 0.15        | 0.23        |
| R34                      | 0.24       | 0.14        | 0.19        | 0.23        | 0.25        | 0.21        |
| R35                      | 0.19       | 0.20        | 0.23        | 0.24        | 0.21        | 0.20        |
| R37                      | 0.17       | 0.19        | 0.18        | 0.22        | 0.17        | 0.25        |
| R38                      | 0.16       | 0.19        | 0.23        | 0.18        | 0.13        | 0.22        |
| R39                      | 0.22       | 0.15        | 0.20        | 0.21        | 0.18        | 0.14        |
| R40                      | 0.22       | 0.17        | 0.19        | 0.24        | 0.20        | 0.25        |
| R41                      | 0.21       | 0.23        | 0.23        | 0.23        | 0.23        | 0.22        |
| R42                      | 0.22       | 0.18        | 0.22        | 0.16        | 0.16        | 0.18        |
| R43                      | 0.21       | 0.19        | 0.23        | 0.22        | 0.24        | 0.24        |
| R44                      | 0.22       | 0.18        | 0.26        | 0.25        | 0.24        | 0.26        |
| R46                      | 0.22       | 0.19        | 0.16        | 0.22        | 0.27        | 0.24        |
| R47                      | 0.14       | 0.19        | 0.24        | 0.19        | 0.21        | 0.21        |
| R48                      | 0.27       | 0.18        | 0.26        | 0.23        | 0.19        | 0.20        |
| R50                      | 0.17       | 0.2         | 0.19        | 0.24        | 0.25        | 0.2         |

**Table ii.** Permeability estimates for additional realizations in validation well 1 (VP1)

| <b>Model Realization</b> | <b>5 m</b> | <b>10 m</b> | <b>15 m</b> | <b>20 m</b> | <b>25 m</b> | <b>30 m</b> |
|--------------------------|------------|-------------|-------------|-------------|-------------|-------------|
| R1                       | 379.31     | 260.66      | 185.88      | 185.19      | 329.09      | 328.35      |
| R2                       | 384.34     | 195.97      | 59.06       | 163.29      | 200.77      | 136.18      |
| R3                       | 118.83     | 174.67      | 172.82      | 178.25      | 110.80      | 241.07      |
| R4                       | 187.04     | 166.46      | 104.98      | 70.26       | 204.86      | 373.47      |
| R5                       | 201.90     | 175.34      | 83.27       | 66.96       | 167.18      | 103.90      |
| R6                       | 264.63     | 148.19      | 104.12      | 211.01      | 115.75      | 183.53      |
| R7                       | 219.98     | 138.02      | 263.07      | 62.54       | 163.68      | 275.60      |
| R8                       | 248.14     | 385.98      | 237.65      | 311.84      | 359.39      | 427.61      |
| R9                       | 498.38     | 232.63      | 227.79      | 76.59       | 84.16       | 116.22      |
| R10                      | 398.47     | 242.10      | 56.23       | 122.51      | 112.90      | 372.70      |
| R11                      | 151.35     | 318.87      | 98.52       | 127.63      | 503.26      | 141.26      |
| R12                      | 352.74     | 312.38      | 61.37       | 179.67      | 310.16      | 203.55      |
| R13                      | 245.65     | 125.45      | 123.16      | 155.68      | 236.63      | 272.13      |
| R15                      | 183.90     | 385.07      | 134.21      | 113.91      | 276.87      | 140.77      |
| R16                      | 849.34     | 102.83      | 195.27      | 222.62      | 174.72      | 298.23      |
| R17                      | 122.66     | 253.21      | 122.16      | 219.00      | 241.98      | 179.78      |
| R18                      | 370.54     | 166.05      | 74.44       | 116.93      | 95.25       | 90.68       |
| R19                      | 261.38     | 95.90       | 233.35      | 82.87       | 230.17      | 174.61      |
| R21                      | 253.12     | 154.08      | 68.50       | 134.08      | 136.13      | 212.08      |
| R22                      | 347.55     | 145.00      | 137.37      | 367.13      | 220.15      | 137.84      |
| R23                      | 365.95     | 172.31      | 63.81       | 203.99      | 183.25      | 176.33      |
| R24                      | 195.54     | 198.98      | 147.49      | 98.15       | 177.45      | 338.20      |
| R25                      | 589.85     | 96.96       | 60.41       | 162.41      | 393.90      | 215.91      |
| R27                      | 183.77     | 234.90      | 180.59      | 75.82       | 276.10      | 222.50      |
| R28                      | 165.27     | 157.76      | 217.18      | 63.85       | 323.63      | 295.20      |
| R29                      | 310.78     | 326.10      | 103.89      | 446.21      | 215.21      | 146.43      |
| R30                      | 419.11     | 209.80      | 208.55      | 81.47       | 128.24      | 215.83      |
| R31                      | 393.50     | 233.34      | 128.40      | 231.34      | 170.30      | 307.12      |
| R32                      | 278.48     | 149.37      | 116.93      | 59.62       | 134.66      | 166.98      |
| R33                      | 756.08     | 209.10      | 61.51       | 173.62      | 62.08       | 243.39      |
| R34                      | 176.57     | 157.58      | 65.83       | 65.75       | 220.10      | 216.13      |
| R35                      | 418.03     | 203.27      | 103.22      | 69.08       | 168.93      | 181.13      |
| R37                      | 348.58     | 260.47      | 242.77      | 40.5        | 496.53      | 299.73      |
| R38                      | 187.07     | 183.05      | 113.43      | 163.43      | 94.32       | 427.80      |
| R39                      | 291.87     | 118.40      | 108.90      | 236.13      | 337.48      | 161.13      |
| R40                      | 185.04     | 192.87      | 169.04      | 209.17      | 459.44      | 182.28      |
| R41                      | 323.40     | 272.29      | 166.90      | 99.29       | 316.77      | 343.22      |
| R42                      | 337.60     | 106.86      | 206.92      | 206.12      | 51.21       | 211.49      |
| R43                      | 376.63     | 396.70      | 66.75       | 141.02      | 127.55      | 258.62      |
| R44                      | 161.55     | 140.87      | 68.15       | 248.66      | 162.83      | 190.65      |
| R46                      | 452.95     | 160.70      | 79.39       | 141.91      | 166.07      | 113.03      |
| R47                      | 127.18     | 115.43      | 168.50      | 78.86       | 102.83      | 149.16      |
| R48                      | 370.88     | 129.33      | 292.19      | 333.32      | 175.53      | 354.65      |
| R50                      | 245.45     | 407.80      | 167.88      | 157.98      | 327.08      | 248.71      |

**Table iii.** Porosity estimates for additional realizations in validation well 2 (VP2)

| <b>Model Realization</b> | <b>5 m</b> | <b>10 m</b> | <b>15 m</b> | <b>20 m</b> | <b>25 m</b> | <b>30 m</b> |
|--------------------------|------------|-------------|-------------|-------------|-------------|-------------|
| R1                       | 0.21       | 0.21        | 0.21        | 0.21        | 0.21        | 0.21        |
| R2                       | 0.25       | 0.23        | 0.27        | 0.21        | 0.22        | 0.18        |
| R3                       | 0.19       | 0.23        | 0.15        | 0.19        | 0.21        | 0.20        |
| R4                       | 0.19       | 0.20        | 0.14        | 0.22        | 0.23        | 0.22        |
| R5                       | 0.21       | 0.27        | 0.18        | 0.26        | 0.22        | 0.19        |
| R6                       | 0.26       | 0.20        | 0.23        | 0.15        | 0.25        | 0.27        |
| R7                       | 0.26       | 0.24        | 0.13        | 0.25        | 0.14        | 0.20        |
| R8                       | 0.14       | 0.14        | 0.22        | 0.15        | 0.24        | 0.23        |
| R9                       | 0.23       | 0.27        | 0.23        | 0.22        | 0.24        | 0.23        |
| R10                      | 0.25       | 0.16        | 0.20        | 0.22        | 0.20        | 0.18        |
| R11                      | 0.21       | 0.19        | 0.26        | 0.25        | 0.24        | 0.22        |
| R12                      | 0.24       | 0.14        | 0.22        | 0.21        | 0.22        | 0.18        |
| R13                      | 0.24       | 0.23        | 0.21        | 0.24        | 0.13        | 0.24        |
| R15                      | 0.21       | 0.24        | 0.25        | 0.20        | 0.23        | 0.19        |
| R16                      | 0.14       | 0.19        | 0.25        | 0.23        | 0.16        | 0.26        |
| R17                      | 0.16       | 0.26        | 0.21        | 0.22        | 0.21        | 0.25        |
| R18                      | 0.23       | 0.27        | 0.19        | 0.21        | 0.19        | 0.23        |
| R19                      | 0.19       | 0.25        | 0.23        | 0.18        | 0.26        | 0.26        |
| R21                      | 0.18       | 0.17        | 0.14        | 0.19        | 0.25        | 0.19        |
| R22                      | 0.22       | 0.20        | 0.18        | 0.22        | 0.23        | 0.21        |
| R23                      | 0.23       | 0.26        | 0.26        | 0.21        | 0.27        | 0.21        |
| R24                      | 0.25       | 0.16        | 0.17        | 0.23        | 0.22        | 0.26        |
| R25                      | 0.17       | 0.21        | 0.22        | 0.24        | 0.20        | 0.18        |
| R27                      | 0.14       | 0.15        | 0.25        | 0.25        | 0.16        | 0.24        |
| R28                      | 0.24       | 0.21        | 0.22        | 0.15        | 0.18        | 0.23        |
| R29                      | 0.16       | 0.15        | 0.23        | 0.18        | 0.24        | 0.21        |
| R30                      | 0.20       | 0.17        | 0.21        | 0.19        | 0.24        | 0.24        |
| R31                      | 0.21       | 0.25        | 0.27        | 0.22        | 0.21        | 0.26        |
| R32                      | 0.25       | 0.18        | 0.18        | 0.20        | 0.17        | 0.14        |
| R33                      | 0.15       | 0.26        | 0.26        | 0.24        | 0.24        | 0.19        |
| R34                      | 0.16       | 0.19        | 0.23        | 0.23        | 0.22        | 0.26        |
| R35                      | 0.25       | 0.21        | 0.24        | 0.25        | 0.26        | 0.25        |
| R37                      | 0.22       | 0.20        | 0.26        | 0.21        | 0.24        | 0.21        |
| R38                      | 0.18       | 0.24        | 0.24        | 0.17        | 0.23        | 0.25        |
| R39                      | 0.23       | 0.21        | 0.18        | 0.21        | 0.17        | 0.24        |
| R40                      | 0.24       | 0.26        | 0.25        | 0.22        | 0.19        | 0.22        |
| R41                      | 0.22       | 0.25        | 0.23        | 0.24        | 0.17        | 0.19        |
| R42                      | 0.16       | 0.26        | 0.21        | 0.24        | 0.16        | 0.23        |
| R43                      | 0.25       | 0.18        | 0.21        | 0.23        | 0.22        | 0.20        |
| R44                      | 0.27       | 0.21        | 0.22        | 0.19        | 0.25        | 0.17        |
| R46                      | 0.23       | 0.19        | 0.25        | 0.20        | 0.17        | 0.23        |
| R47                      | 0.20       | 0.16        | 0.25        | 0.25        | 0.24        | 0.20        |
| R48                      | 0.18       | 0.18        | 0.19        | 0.21        | 0.23        | 0.22        |
| R50                      | 0.17       | 0.19        | 0.18        | 0.22        | 0.22        | 0.22        |

**Table iv.** Permeability estimates for additional realizations in validation well 2 (VP2)

| <b>Model Realization</b> | <b>5 m</b> | <b>10 m</b> | <b>15 m</b> | <b>20 m</b> | <b>25 m</b> | <b>30 m</b> |
|--------------------------|------------|-------------|-------------|-------------|-------------|-------------|
| R1                       | 249.86     | 225.22      | 246.61      | 242.39      | 247.71      | 248.00      |
| R2                       | 95.20      | 285.68      | 248.40      | 129.46      | 259.32      | 225.79      |
| R3                       | 210.15     | 249.43      | 188.74      | 169.56      | 153.44      | 150.78      |
| R4                       | 261.12     | 166.09      | 230.64      | 141.59      | 162.11      | 425.82      |
| R5                       | 789.17     | 168.73      | 258.06      | 305.51      | 141.85      | 261.91      |
| R6                       | 222.61     | 236.47      | 383.56      | 333.38      | 161.19      | 614.10      |
| R7                       | 376.97     | 156.81      | 277.21      | 188.69      | 170.06      | 382.66      |
| R8                       | 324.07     | 231.58      | 319.35      | 117.89      | 144.11      | 326.74      |
| R9                       | 314.09     | 292.84      | 325.72      | 341.66      | 182.97      | 170.39      |
| R10                      | 206.30     | 199.17      | 162.96      | 221.21      | 206.78      | 214.83      |
| R11                      | 498.74     | 352.02      | 111.43      | 220.14      | 204.01      | 73.44       |
| R12                      | 320.34     | 364.45      | 151.08      | 382.86      | 271.56      | 237.48      |
| R13                      | 310.92     | 168.93      | 101.24      | 903.17      | 294.32      | 432.77      |
| R15                      | 232.79     | 255.19      | 268.45      | 85.29       | 234.97      | 252.18      |
| R16                      | 282.88     | 240.28      | 197.54      | 170.48      | 126.56      | 316.02      |
| R17                      | 339.86     | 168.33      | 147.77      | 309.62      | 153.24      | 172.51      |
| R18                      | 314.12     | 219.46      | 183.26      | 161.30      | 228.06      | 290.04      |
| R19                      | 255.03     | 144.89      | 253.03      | 253.29      | 80.39       | 331.35      |
| R21                      | 230.07     | 148.77      | 135.18      | 191.74      | 224.57      | 352.67      |
| R22                      | 108.40     | 353.74      | 259.81      | 128.19      | 356.51      | 476.83      |
| R23                      | 314.54     | 146.52      | 294.84      | 359.42      | 154.85      | 213.29      |
| R24                      | 249.64     | 93.13       | 295.11      | 162.75      | 312.53      | 382.09      |
| R25                      | 65.74      | 325.92      | 210.69      | 159.77      | 274.75      | 216.15      |
| R27                      | 180.03     | 98.51       | 272.17      | 343.36      | 126.86      | 276.55      |
| R28                      | 605.71     | 284.30      | 475.18      | 76.64       | 183.92      | 245.18      |
| R29                      | 424.41     | 479.04      | 299.31      | 357.95      | 295.87      | 323.31      |
| R30                      | 404.93     | 203.29      | 194.22      | 166.63      | 369.01      | 160.38      |
| R31                      | 146.73     | 457.63      | 355.88      | 310.11      | 185.30      | 208.33      |
| R32                      | 314.20     | 143.63      | 177.56      | 273.10      | 154.19      | 482.85      |
| R33                      | 344.27     | 347.94      | 302.71      | 168.65      | 104.95      | 112.74      |
| R34                      | 274.43     | 167.98      | 159.12      | 97.46       | 130.56      | 220.56      |
| R35                      | 264.95     | 238.51      | 283.41      | 159.71      | 226.63      | 470.54      |
| R37                      | 229.77     | 190.45      | 146.58      | 423.58      | 172.59      | 111.28      |
| R38                      | 203.36     | 403.54      | 178.82      | 110.61      | 90.45       | 281.38      |
| R39                      | 432.48     | 144.75      | 462.12      | 172.01      | 226.16      | 188.94      |
| R40                      | 125.30     | 197.07      | 222.82      | 262.67      | 216.51      | 267.67      |
| R41                      | 339.85     | 164.82      | 155.85      | 576.46      | 296.95      | 145.37      |
| R42                      | 91.44      | 155.31      | 268.61      | 134.41      | 336.38      | 101.83      |
| R43                      | 145.94     | 302.80      | 366.89      | 210.76      | 241.69      | 297.30      |
| R44                      | 285.47     | 101.72      | 175.48      | 199.55      | 291.47      | 229.55      |
| R46                      | 125.20     | 133.55      | 194.17      | 386.73      | 146.38      | 142.73      |
| R47                      | 117.57     | 337.95      | 541.82      | 143.06      | 162.88      | 458.12      |
| R48                      | 396.18     | 313.38      | 137.42      | 141.91      | 636.48      | 560.63      |
| R50                      | 387.84     | 173.45      | 57.70       | 385.97      | 183.59      | 318.98      |
